# Supplementary material
Source: PubMed Central journal article supplement (PMC2732031)
Supplement: 97320630003375S1.pdf [file 97320630003375S1.pdf]

## Supplementary material

| TF   | TF binding site | Position  | Function                                                                                                                                                                                                                                                         | Score | Swiss-Prot ID          |
|------|-----------------|-----------|------------------------------------------------------------------------------------------------------------------------------------------------------------------------------------------------------------------------------------------------------------------|-------|------------------------|
| cpxR | GTAAATTA        | 413 - 420 | Member of the two-component regulatory system cpxA/cpxR. This system combats a variety of extracytoplasmic protein-mediated toxicities. It performs this function by increasing the synthesis of the periplasmic protease, degP as well as that of cpxP protein. | 9     | P0AE88<br>(CPXR_ECOLI) |
| argR | AATTAATA        | 416 - 423 | Represses the synthesis of biosynthetic enzymes and activates the arginine catabolism. Controls the transcription of the two operons rocABC and rocDEF.                                                                                                          | 11    | P17893<br>(ARGR_BACSU) |

**Table 1:** Putative transcription factors binding sites within the 5' region of 16SrRNA gene of *Bacillus* sp. strain SJ-101.

| Profile Hit     | ZSCORE | Confidence | Protein in fold library                                                     |
|-----------------|--------|------------|-----------------------------------------------------------------------------|
| hs2jiga         | 4.11   | Likely     | Prolyl-4 hydroxylase - <i>Chlamydomonas reinhardtii</i>                     |
| hsd1cpo_2       | 2.51   | Guess      | Cloroperoxidase                                                             |
| hs1skha         | 2.51   | Guess      | Major prion protein 2 - <i>Bos taurus</i>                                   |
| hsd1b8ja        | 2.43   | Guess      | Alkaline phosphatase                                                        |
| alk_phosphatase | 2.40   | Guess      | Alkaline phosphatase - <i>E. coli</i>                                       |
| hs1o75a         | 2.35   | Guess      | 47 kda membrane antigen                                                     |
| hs3c01d         | 4.11   | Guess      | Surface presentation of antigens protein spas <i>Salmonella typhimurium</i> |

**Table 2:** Homology of the short protein encoded by the ORF within the 5' region of 16SrRNA gene of *Bacillus* sp. strain SJ-101 using Fold library HOMSTRAD database through FUGUE v2.s.07.
